# Supplementary material for: A Retrospective Analysis of 10-Year Data Assessed the Diagnostic Accuracy and Efficacy of Cytogenomic Abnormalities in Current Prenatal and Pediatric Settings
Source: Front Genet. 2019 Nov 20;10:1162. doi: 10.3389/fgene.2019.01162 (PMC6902283; doi:10.3389/fgene.2019.01162)
Supplement: Supplementary file 4 [file Table_4.xlsx]

## Sheet: Sheet1
Table S4 Pathogenic copy number variants in pediatric cases
Type of pathogenic copy number variant	Case number	Sample type		Methods		Results (Cytogenetics)		Results (aCGH/hg19)
			Karyotype	FISH	aCGH	Karyotype	FISH	Result	Size	Breakpoint position
Recurrent genomic disorder	282216	PB		√	√		ish del(22)(q11.21q11.21)(TBX1-,SHANK3+)	arr 15q11.2(22,765,628-23,300,287)x3,22q11.21(18,894,835-19,744,894)x1(19,755,211-20,311,763)x1	0.535 Mb; 1.417 Mb	chr22: LCDB
	167110	PB	√	√	√	46,XY	ish del(22)(q11.2q11.2)(TUPLE1-)	arr 17p13.2(6,630,406-6,794,979)x1; 22q11.21 (18,894,635-21,464,260)x1	0.165 Mb; 2.570 Mb	chr22: LCDA-D
	267716	PB		√	√		ish del(22)(q11.21q11.21)(TBX1-,SHANK3+)	arr 22q11.21(18,613,856-21,808,993)x1	3.195 Mb	LCRA-D
	263815	PB	√	√	√	46,XY	ish del(22)(q11.21q11.21)(TUPLE1-,SHANK3+)	arr 22q11.21(18,628,019-21,454,721)x1	2.827 Mb	LCRA-D
	210912	PB	√		√	46,XX		arr 22q11.21(18,651,414-21,454,862)x1	2.803 Mb	LCRA-D
	229310	PB	√	√	√	46,XX	ish del(22)(q11.2q11.2)(TUPLE1-)	arr 22q11.21(18,651,414-21,464,260)x1	2.813 Mb	LCRA-D
	87211	PB			√			arr 22q11.21(18,651,414-21,464,260)x3	2.813 Mb	LCRA-D
	142016	PB	√	√	√	46,XY	ish del(22)(q11.21q11.21)(TBX1-,SHANK3+)	arr 22q11.21(18,651,614-21,454,721)x1	2.803 Mb	LCRA-D
	244216	PB		√	√		ish del(22)(q11.21q11.21)(TBX1-,SHANK3+)	arr 22q11.21(18,651,614-21,454,721)x1	2.803 Mb	LCRA-D
	254713	PB		√	√		ish del(22)(q11.21q11.21)(TUPLE1-,SHANK3+)	arr 22q11.21(18,651,614-21,454,721)x1	2.803 Mb	LCRA-D
	172013	PB		√	√		ish del(22)(q11.2q11.2)(TUPLE1-,SHANK3+)	arr 22q11.21(18,651,614-21,454,721)x1	2.803 Mb	LCRA-D
	39516	PB	√	√	√	46,XY,del(22)(q11.2q11.2)	ish del(22)(q11.21q11.21)(TBX1-,SHANK3+)[20]/nuc ish(TBXx1,SHANK3x2)[50]	arr 22q11.21(18,661,724-21,505,417)x1	2.844 Mb	LCRA-D
	91212	PB	√	√	√	46,XX,del(22)(q11.21q11.21)	ish del(22)(q11.2q11.2)(TUPLE1-)[5]/nuc ish (TUPLE1x1)[49/50]	arr 22q11.21(18,661,724-21,505,417)x1	2.844 Mb	LCRA-D
	143713	PB	√	√	√	46,XY,del(22)(q11.21q11.21)	ish del(22)(q11.2q11.2)(TUPLE1-,SHANK3+)	arr 22q11.21(18,661,724-21,505,417)x1	2.844 Mb	LCRA-D
	117015	PB		√	√		ish del(22)(q11.2q11.2)(HIRA-,SHANK3+)[25]/nuc ish(HIRAx1,SHANK3x2)[50]	arr 22q11.21(18,661,724-21,505,417)x1	2.844 Mb	LCRA-D
	169512	PB		√	√		ish del(22)(q11.2q11.2)(TUPLE1-,SHANK3+)	arr 22q11.21(18,661,724-21,561,514)x1	2.900 Mb	LCRA-D
	292412	PB		√	√		ish del(22)(q11.2q11.2)(TUPLE1-,SHANK3+)	arr 22q11.21(18,706,001-21,505,417)x1	2.799 Mb	LCRA-D
	266916	PB		√	√		ish del(22)(q11.21q11.21)(TBX1-,SHANK3+)	arr 22q11.21(18,894,339-21,454,721)x1	2.560 Mb	LCRA-D
	151417	PB		√	√		nuc ish(TBX1x3,SHANK3x2)	arr 22q11.21(18,894,339-21,454,721)x3	2.560 Mb	LCRA-D
	34716	PB		√	√		nuc ish(TBX1x3,SHANK3x2)[49/50]	arr 22q11.21(18,894,339-21,808,993)x3	2.915 Mb	LCRA-D
	172911	PB		√	√		ish del(22)(q11.2q11.2)(TUPLE1-)	arr 22q11.21(18,894,635-21,464,260)x1	2.570 Mb	LCRA-D
	65811	PB		√	√		ish del(22)(q11.2q11.2)(TUPLE1-)	arr 22q11.21(18,894,635-21,464,260)x1	2.570 Mb	LCRA-D
	248310	PB		√	√		ish del(22)(q11.2q11.2)(TUPLE1-)	arr 22q11.21(18,894,635-21,464,260)x1	2.570 Mb	LCRA-D
	109511	PB			√			arr 22q11.21(18,894,635-21,464,260)x1	2.570 Mb	LCRA-D
	226909	PB	√	√	√	46,XY	ish del(22)(q11.2q11.2)(TUPLE1-)	arr 22q11.21(18,894,635-21,464,260)x1	2.570 Mb	LCRA-D
	63112	PB		√	√		nuc ish (TUPLE1x3)[25]	arr 22q11.21(18,894,835-21,335,662)x3	2.441 Mb	LCRA-D
	156012	PB	√	√	√	46,XY	nuc ish 22q11.2(TUPLE1x3),22q13.3(SHANK3x2)[50]	arr 22q11.21(18,894,835-21,335,662)x3	2.441 Mb	LCRA-D
	56013	PB		√	√		ish 15q11.2(D15S10x2); nuc ish (TUPLE1x3,SHANK3x2)[50]	arr 22q11.21(18,894,835-21,440,514)x3	2.546 Mb	LCRA-D
	81912	PB	√	√	√	46,XY	nuc ish 22q11.2(TUPLE1x3)[50]	arr 22q11.21(18,894,835-21,505,417)x3	2.611 Mb	LCRA-D
	224916	PB			√			arr 22q11.21(18,894,835-21,505,756)x1	2.611 Mb	LCRA-D
	29817	PB		√	√		ish del(22)(q11.21q11.21)(TBX1-,SHANK3+)	arr 22q11.21(18,900,442-21,454,721)x1	2.554 Mb	LCRA-D
	211517	PB		√	√		ish del(22)(q11.21q11.21)(TBX1-,SHANK3+)	arr 22q11.21(18,900,442-21,454,721)x1	2.554 Mb	LCRA-D
	87911	PB		√	√		ish 22q11.2(TUPLE1x2)[20]; nuc ish 22q11.2(TUPLE1x3)[40/50]	arr 22q11.21(18,908,844-21,798,905)x3	2.890 Mb	LCRA-D
	190415	PB		√	√		ish del(22)(q11.21q11.21)(TBX1-,SHANK3+)	arr 22q11.21(19,010,449-21,440,514)x1	2.430 Mb	LCRA-D
	54512	PB	√		√	46,XX		arr 22q11.21(20,973,336-21,505,417)x1	0.532 Mb	LCRC-D
	275015	PB	√		√	46,XY		arr 22q11.22q11.23(22,997,935-23,654,222)x1	0.656 Mb	LCRF
	111210	PB	√		√	46,XX		arr 22q11.22q11.23(22,998,084-23,654,363)x1	0.656 Mb	LCRF
	117912	PB	√		√	46,XY		arr 22q11.22q11.23(23,012,013-24,993,750)x3	1.982 Mb	?
	160614	PB	√	√	√	46,XY	nuc ish 9q34(ABL1x2),22q11.2(BCRx3)[136/200]	arr 4p16.1(9,371,016-10,674,527)x3; 22q11.22q11.23(21,808,934-23,813,300)x3	1.304 Mb; 2.004 Mb	?LCRE-F
	175512	PB		√			ish del(22)(q11.2q11.2)(TUPLE1-,SHANK3+)
	103616	PB		√			ish del(22)(q11.21q11.21)(TBX1-,SHANK3+)
	109310	PB	√	√		46,XY,del(22)(q11.2q11.2)	ish del(22)(q11.2q11.2)(TUPLE1-)
	144311	PB	√	√		46,XX,del(22)(q11.2q11.2)	ish del(22)(q11.2q11.2)(TUPLE1-)
	157613	PB	√	√		46,XY,del(22)(q11.2q11.2)	ish del(22)(q11.2q11.2)(TUPLE1-,SHANK3+)
	32208	PB	√	√		46,XY,del(22)(q11.2q11.2)	ish del(22)(q11.2q11.2)(TUPLE1-); ish 11p15.5(IGF2x2)
	104615	PB		√			ish del(22)(q11.2q11.2)(HIRA-,SHANK3+)
	237810	PB	√	√		46,XX,del(22)(q11.2q11.2)	ish del(22)(q11.2q11.2)(TUPLE1-)
	160415	PB		√			ish del(22)(q11.2q11.2)(HIRA-,SHANK3+)
	59716	PB		√			ish del(22)(q11.21q11.21)(TBX1-,SHANK3+)[25]
	204108	PB	√	√		46,XX,del(22)(q11.2q11.2)	ish del(22)(q11.2q11.2)(TUPLE1-)
	102808	PB		√	√			arr 22q11.21(18,891,526-21,377,507)x1	2.486 Mb	LCRA-D
	266508	PB	√	√	√	46,XX,del(22)(q11.21q11.23)	ish del(22)(q11.2q11.2)(TUPLE1-)	arr 22q11.21(18,891,526-21,362,556)x1	2.471 Mb	LCRA-D
	210908	PB	√	√	√	46,XY,del(22)(q11.2q11.2)	ish del(22)(q11.2q11.2)(TUPLE1-)	arr 22q11.21(18,891,526-21,362,556)x1	2.471 Mb	LCRA-D
	9509	PB			√			arr 16p13.11(15,131,723-16,305,736)x1,22q11.21(20,748,976-21,377,507)x1	1.174 Mb at 16p13.11; 0.629 Mb at 22q11.21	LCRC-D
	87508	PB		√	√		ish del(22)(q11.2q11.2)(TUPLE1-)	arr 22q11.21(18,891,526-21,377,507)x1	2.486 Mb	LCRA-D
	267908	PB	√		√	46,XY		arr 22q11.21(21,070,129-21,377,507)x3	0.307 Mb	LCRC-D
	257908	PB		√	√		ish del(22)(q11.21q11.21)(TUPLE1-)	arr 22q11.21(18,891,526-21,362,556)x1	2.471 Mb	LCRA-D
	184615	PB			√			arr 7q11.23(72,314,610-74,133,332)x3	1.819 Mb
	30516	PB		√	√		ish 7p21.1(TWIST1x2),7q11.23(ELNx3)[50]	arr 7q11.23(72,401,086-74,133,332)x3,13q21.32q21.33(68,281,252-70,391,843)x3	1.732 Mb
	271413	PB		√	√		ish del(7)(q11.23q11.23)(TWIST1+,ELN-)[10]	arr 7q11.23(72,700,414-74,139,390)x1	1.439 Mb
	2716	PB		√	√		ish 7p21.1(TWIST1x2),7q11.23(ELNx3)	arr 7q11.23(72,700,414-74,139,390)x3	1.439 Mb
	185816	PB	√	√	√	46,XY,del(7)(q11.23q11.23)	ish(TWIST1x2,ELNx1)[25]/nuc ish(TWIST1x2,ELNx1)[50]	arr 7q11.23(72,700,414-74,139,390)x1	1.439 Mb
	100814	PB	√	√	√	46,XX	ish del(7)(q11.23q11.23)(TWIST1+,ELN-)	arr 7q11.23(72,700,414-74,139,390)x1	1.439 Mb
	256311	PB	√	√	√	46,XX	ish del(7)(q11.23q11.23)(TWIST1+,ELN-)	arr 7q11.23(72,726,378-74,139,531)x1	1.413 Mb
	132817	PB	√	√	√	46,XY	nuc ish 7p21.1(TWIST1x2),7q11.23(ELNx3)[50]	arr 3p26.1(4,094,267-4,562,686)x4,7q11.23(72,726,572-74,093,106)x3	1.367 Mb
	142109	PB	√	√	√	46,XX	nuc ish 7q11.23(ELNx3)	arr 7q11.23(72,726,578-74,139,390)x3	1.413 Mb
	210917	PB		√	√		nuc ish 7p21.1(TWIST1x2),7q11.23(ELNx3)	arr 3p26.1(4,070,291-4,558,292)x4,7q11.23(72,727,712-74,139,390)x3	1.412 Mb
	66812	PB		√			ish del(7)(q11.23q11.23)(TWIST1+,ELN-)
	66310	PB		√			ish del(7)(7q11.23q11.23)(ELN-,D7S522x2+)
	141317	PB		√			ish del(7)(q11.23q11.23)(TWIST1+,ELN-)
	167008	PB		√	√		ish del(7)(q11.23q11.23)(ELN-,D7S522+)	arr 7q11.23(72,507,129-73,946,105)x1	1.439 Mb
	254912	PB			√			arr 15q11.1q13.1(20,416,244-29,214,164)x3	8.798 Mb	?Class I: BP1-BP3
	199814	PB			√			arr 15q11.1q11.2(20,481,702-23,080,961)x1	2.599 Mb	BP1-BP2
	51515	PB			√			arr 15q11.1q11.2(20,481,702-23,208,901)x1	2.727 Mb	BP1-BP2
	178014	PB			√			arr 15q11.1q11.2(20,616,663-23,208,901)x1	2.592 Mb	BP1-BP2
	129110	PB	√		√	46,XY		arr 15q11.2(22,304,396-23,085,237)x1	0.780 Mb	BP1-BP2
	173317	PB		√	√		ish del(15)(q11.2q13.1)(UBE3A-,D15S936+)	arr 15q11.2q13.1(22,304,596-29,031,749)x1	6.727 Mb	Class I: BP1-BP3
	36614	PB			√			arr 15q11.2(22,558,697-23,179,948)x1	0.621 Mb	BP1-BP2
	54111	PB	√	√	√	46,XY	ish subtel,X(pterx1,qterx1),Y(pterx1,qterx1)	arr 15q11.2(22,765,428-23,167,899)x1	0.402 Mb	BP1-BP2
	278109	PB	√		√	46,XY,del(15)(q11.2q13.1)	ish del(15)(q11.2q13.1)(D15S10-)	arr 15q11.2q13.1( 22,765,428-29,060,634)x1	6.295 Mb	Class I: BP1-BP3
	70517	PB			√			arr 15q11.2(22,765,628-23,085,096)x1	0.319 Mb	BP1-BP2
	223915	PB			√			arr 15q11.2(22,765,628-23,179,948)x1	0.414 Mb	BP1-BP2
	226617	PB			√			arr 15q11.2(22,765,628-23,179,948)x1	0.414 Mb	BP1-BP2
	239814	PB			√			arr 15q11.2(22,765,628-23,179,948)x1	0.414 Mb	BP1-BP2
	2414	PB			√			arr 15q11.2(22,765,628-23,208,901)x1	0.443 Mb	BP1-BP2
	226517	PB			√			arr 15q11.2(22,765,628-23,217,514)x1	0.452 Mb	BP1-BP2
	308716	PB			√			arr 15q11.2(22,765,628-23,300,287)x3	0.443 Mb	BP1-BP2
	38915	PB		√	√		ish del(15)(q11.2q13.1)(SNRPN-)[25]/nuc ish(SNRPNx1)[50]	arr 15q11.2q13.1(22,765,628-28,535,051)x1	5.769 Mb	Class I: BP1-BP3
	89813	PB	√	√	√	46,XX,del(15)(q11.2q13.1)	ish del(15)(15q11.2q13)(D15Z1+,D15S10-,PML+)	arr 15q11.2q13.1(22,765,628-28,691,460)x1	5.926 Mb	Class I: BP1-BP3
	223612	PB		√	√		ish del(15)(q11.2q13.1)(D15S10-)	arr 15q11.2q13.1(23,208,642-28,535,207)x1	5.327 Mb	Class II: BP2-BP3
	312716	PB		√	√		ish 15q11.2(UBE3Ax3)	arr 15q11.2q13.1(23,208,842-29,031,749)x3	5.823 Mb	Class II: BP2-BP3
	84112	PB		√	√		ish del(15)(q11.2q13.1)(D15S10-)	arr 15q11.2q13.1(23,662,509-28,535,051)x1	4.873 Mb	Class II: BP2-BP3
	241715	PB		√	√		nuc ish 15q11.2(SNRPNx3)[48/50]	arr 15q11.2q13.1(23,672,623-29,214,164)x3	5.542 Mb	Class II: BP2-BP3
	53911	PB		√	√		ish del(15)(q11.2q13)(D15S10-)	arr 15q11.2q13.1(23,684,455-28,535,207)x1	4.851 Mb	Class II: BP2-BP3
	172912	PB		√	√		ish del(15)(q15q11.2q13.1)(D15Z1+,D15S10-,PML+)	arr 15q11.2q13.1(23,707,452-28,492,171)x1	4.785 Mb	Class II: BP2-BP3
	20012	PB		√	√		ish del(15)(q11.2q13.1)(SNRPN-)	arr 15q11.2q13.1(23,707,452-28,520,313)x1	4.813 Mb	Class II: BP2-BP3
	108313	PB		√	√		ish del(15)(q11.2q13.1)(D15S10-)	ar[hg19] 15q11.2q13.1(23,707,452-28,520,313)x1	4.813 Mb	Class II: BP2-BP3
	132713	PB	√	√	√	46,XY,del(15)(q11.2q13.1)	ish del(15)(q11.2q13.1)(D15S10-)	arr 15q11.2q13.1(23,782,576-28,559,402)x1	4.777 Mb	Class II: BP2-BP3
	75312	PB		√			ish del(15)(q11.2q11.2)(D15S10-)
	178308	PB	√	√		46,XX,del(15)(q11.2q11.2)	ish del(15)(q11.2q11.2)(D15S10-)
	47008	PB	√		√	46,XX		arr 15q11.2q13.1(23,656,936-28,525,460)x1	4.869 Mb	Class II: BP2-BP3
	269008	PB	√		√	46,XY,del(15)(q11.2q13)		arr 15q11.2q13.1(22,784,523-29,212,509)x1	6.428 Mb	Class I: BP1-BP3
	257808	PB	√	√	√	46,XY,del(15)(q11.2q13)	ish del(15)(q11.2q12)(D15S10-)[20]	arr 15q11.2q13.1(22,784,523-29,212,509)x1	6.428 Mb	Class I: BP1-BP3
	133409	PB	√	√	√	46,XY,del(15)(q11.2q13.1)	ish del(15)(q11.2q13.1)(D15S10-)	arr 15q11.2q13.1(23,656,936-28,525,460)x1	4.869 Mb	Class II: BP2-BP3
	39008	PB	√		√	46,XY,dup(15)(q11.2q13.1)		arr 15q11.2q13.1(20,849,110-29,212,509)x3	8.363 Mb	?Class I: BP1-BP3
	270916	PB	√		√	46,XX		arr 15q11.1q11.2(20,597,049-23,699,760)x3	3.103 Mb	BP1-BP2
	347517	PB			√			arr 15q11.2(22,765,628-23,208,901)x1	0.443 Mb	BP1-BP2
	316717	PB	√	√	√	46,XY	nuc ish Xp22.31(KAL1,STS,dim KAL1)x1,Xcen(DXZ1x1)[200] ish X(KAL1+,STS+,DXZ1+),?Y(dim KAL1+)	arr 15q11.2(22,765,628-23,217,514)x1,Xp22.31(8,597,747-8,698,299)x2	0.452 Mb at 15q11.2; 0.101 Mb at Xp22.31	BP1-BP2
	111911	PB			√			arr 17p11.2(16,757,364-20,219,605)x1	3.462 Mb
	123215	PB		√			ish del(17)(p11.2p11.2)(LIS1+,FLII-)[25].nuc ish(LIS1x2,FLIIx1)[50]	arr 17p11.2(16,822,683-20,217,044)x1	3.394 Mb
	73515	PB	√		√	46,XX		arr 17p11.2(18,533,774-22,154,574)x3	3.621 Mb
	301815	PB			√			arr 17p12(14,063,183-15,406,211)x3	1.343 Mb
	171209	PB			√			arr 17p12(14,073,340-15,455,438)x3	1.382 Mb
	269811	PB			√			arr 17p12(14,100,118-15,442,066)x1	1.342 Mb
	301615	PB			√			arr 17p12(14,111,772-15,442,066)x3	1.330 Mb
	104112	PB	√		√	46,XX		arr 17p12(14,111,772-15,442,066)x1	1.330 Mb
	49613	PB	√		√	46,XY		arr 12p12.2(21,017,576-21,263,124)x1, 17p12(14,111,772-15,442,066)x3	0.246 Mb at 12p12.2; 1.330 Mb at 17p12
	93013	PB	√		√	46,XY		arr 17p12(14,111,772-15,442,066)x3	1.330 Mb
	160213	PB			√			arr 16p13.12p13.11(14,715,163-16,276,115)x3	1.561 Mb
	220111	PB			√			arr 16p13.12p13.11(14,779,935-16,276,256)x3	1.496 Mb
	279109	PB			√			arr 16p13.11(14,968,655-16,267,450)x1	1.299 Mb
	295014	PB	√	√	√	46,XX	nuc ish 16p13(MYH11x3)16q22(CBFBx2)[100]	arr 16p13.11(14,968,855-16,291,918 )x3	1.323 Mb
	204217	PB		√	√		ish del(16)(p13.11p12.3)(MYH11-,CBFB+)[5].nuc ish(MYH11x1,CBFBx2)[200]	arr 16p13.11p12.3(14,968,855-16,955,421)x1	1.987 Mb
	81717	PB		√	√		nuc ish(MYH11x3,CBFBx2)[200]	arr 16p13.11(15,125,720-16,291,918)x3	1.166 Mb
	188409	PB			√			arr 16p13.11(15,131,523-16,259,484)x3	1.128 Mb
	122115	PB			√			arr 16p13.11p12.3(15,397,403-18,162,167)x3	2.765 Mb
	26414	PB	√	√	√	46,XY	ish del(16)(p12.3p13.11)(MYH11-,CBFB+)[5]	arr 16p13.11p12.3(15,513,869-18,738,020)x1	3.224 Mb
	65608	PB		√	√		ish del(16)(p12.3p13.11)(NDE-,XYLT1-)	arr 16p13.11p12.3(15,492,317-17,804,366)x1	2.312 Mb
	192711	PB	√	√	√	46,XY,del(X)(p22.31p22.33)	ish del(X)(p22.31p22.33)(STS-,CEPX+)	arr Xp22.33p22.31(2,748,278-8,674,497)x0	5.926 Mb
	169612	PB	√		√	46,XY		arr Xp22.31(6,018,632-6,031,805)x0	0.0132 Mb
	278313	PB			√			arr Xp22.31(6,413,905-8,184,272)x3	1.770 Mb
	325916	PB		√	√		ish del(X)(p22.31p22.31)(STS-,KAL1+)[5]	arr Xp22.31(6,456,036-8,097,511)x0	1.641 Mb
	184213	PB		√	√		ish del(X)(p22.31p22.31)(STS-,CEPX+)[5]	arr Xp22.31(6,477,550-8,124,102)x0	1.647 Mb
	74012	PB			√			arr Xp22.31(6,488,721-8,097,511)x3	1.609 Mb
	107913	PB	√	√	√	46,XX	ish del(X)(p22.31p22.31)(STS-,DXZ1+)[10]	arr Xp22.31(6,488,721-8,097,511)x1	1.609 Mb
	155409	PB		√	√		nuc ish dup(X)(p22.31)(STSx2)	arr Xp22.31(6,489,677-8,107,400)x2	1.618 Mb
	31211	PB		√	√		ish del(X)(p22.3p22.3)(STS-,CEPX+)	arr Xp22.31(6,489,677-8,115,294)x1	1.626 Mb
	116411	PB	√	√	√	46,XY	nuc ish Xp22.3(STSx2)[42/50]	arr Xp22.31(6,489,677-8,131,951)x2	1.642 Mb
	10711	PB	√		√	46,XY		arr Xp22.31(6,883,506-7,512,988)x2	0.629 Mb
	322315	PB		√			nuc ish Xp22.3(STSx3),Xcen(DXZ1x2)[50]
	261808	PB		√	√		ish Xp22.3(STSx3)	arr Xp22.31(6,817,869-7,881,856)x3	1.064 Mb
	11508	PB	√	√	√	46,XY	ish del(X)(p22.3p22.3)(STS-,DXZ1+)[10]/nuc ish (STSx0,DXZ1x1)[50]	arr Xp22.31(6,400,891-7,881,856)x0	1.481 Mb
	87416	PB			√			arr Xp22.31(7,033,257-7,237,735)x2	0.204 Mb
	27715	PB	√		√	46,XY		arr Xp22.31(8,152,876-8,907,542)x2	0.755 Mb
	368517	PB	√		√	46,XY		arr Xp22.31(6,456,036-8,131,810)x2	1.676 Mb
	85210	PB	√		√	46,XX,del(22)(q13.31)		arr 22q13.31q13.33(45,647,027-51,219,150)x1,Xq12(65,768,010-65,926,404)x3	5.572 Mb at 22q13.31q13.33; 0.158 Mb at Xq12
	116015	PB			√			arr 22q13.33(51,123,040-51,193,680)x1	0.071 Mb
	168815	PB	√		√	46,XX,del(7)(q35q36.1)		arr 7q35q36.1(144,520,633-150,709,257)x1,12q24.33(129,761,423-132,093,158)x3	6.189 Mb at 7q35q36.1; 2.332 Mb at 12q24.33
	272809	PB			√			arr 7q36.2(153,891,336-153,949,969)x1	0.058 Mb
	63411	PB		√	√		ish 7q11.23(ELNx2),7q31(D7S522x2)[20]	arr 7q35(144,486,580-145,950,112)x1	1.464 Mb
	75016	PB	√		√	46,XY,dup(1)(q21.1q21.2)		arr 1q21.1q21.2(142,617,943-147,824,207)x3	5.206 Mb	? Class II
	7715	PB	√		√	46,XY		arr 1q21.1(144,526,927-145,833,054)x3	1.306 Mb	Class II
	213409	PB			√			arr 1q21.1(144,927,578-145,291,911)x1,1q21.1(146,506,110-147,824,348)x1	0.364 Mb; 1.318 Mb	Complex
	148409	PB	√		√	46,XX		arr 1q21.1(144,927,578-145,291,911)x1,1q21.1(145,818,502-147,806,799)x1	0.364 Mb; 1.988 Mb	? Class II/? Complex
	285014	PB	√		√	46,XX		arr 1q21.1q21.2(144,932,763-147,824,207)x3	2.891 Mb	Class II
	205312	PB			√			arr 1q21.1q21.2(144,994,747-149,875,088)x3	4.880 Mb	Class II
	238416	PB			√			arr 1q21.1(145,388,355-145,833,054)x1	0.445 Mb	TAR
	119414	PB			√			arr 1q21.1(145,388,355-146,310,732 )x3	0.922 Mb	TAR
	88615	PB			√			arr 1q21.1(145,632,334-145,833,054)x3	0.201 Mb	TAR
	74011	PB	√		√	46,XY		arr 1q21.1(145,818,502-149,224,184)x3	3.406 Mb	Class II
	36715	PB			√			arr 1q21.1q21.2(146,347,096-147,824,207)x3,15q15.1(40,744,070-41,280,205)x3	1.477 Mb at 1q21.1q21.2; 0.536 Mb at 15q15.1	Class I
	274513	PB	√		√	46,XY		arr 1q21.1q21.2(146,542,843-147,786,706)x3	1.244 Mb	Class I
	4609	PB			√			arr 1q21.1(144,191,075-144,524,956)x3, 1q21.1(145,078,202-146,138,566)x1	0.334 Mb; 1.060 Mb	?TAR
	214308	PB			√			arr 1q21.1(144,191,075-144,524,956)x3, 1q21.1(145,078,202-146,138,566)x1	0.334 Mb; 1.060 Mb	?TAR
	292517	PB			√			arr 1q21.1(145,632,334-146,310,732)x3	0.678 Mb	TAR
	160113	PB			√			arr 2q13(111,399,043-113,098,827)x3	1.700 Mb
	221816	PB			√			arr 2q13q14.2(113,389,816-120,260,228)x1	6.870 Mb
	234514	PB			√			arr 2q12.3q13(109,205,036-110,427,254)x1,2q13(111,041,317-113,080,477)x3	1.222 Mb at 2q12.3q13; 2.039 Mb at 2q13
	69016	PB			√			arr 3q29(195,697,011-197,339,329)x1	1.642 Mb
	48213	PB			√			arr 3q29(195,877,659-196,665,087)x1	0.787 Mb
	98913	PB	√		√	46,XX		arr 3q29(195,895,912-197,180,267)x1	1.284 Mb
	139914	PB	√		√	46,XY		arr 3q29(196,007,825-197,016,624)x1	1.009 Mb
	190215	PB			√			arr 3q29(196,007,825-197,120,392)x1	1.113 Mb
	152808	PB	√	√	√	46,XX,del(3)(q29qter)	ish 22q11.2(TUPLE1x2)[20]/nuc ish 22q11.2(TUPLE1x2)[50] ish del(3)(q29qter)(pter+,qter-)	arr 3q29(195,781,878-197,314,364)x1	1.532 Mb
	145708	PB	√	√	√	46,XX,der(11)t(3;11)(q29;q24.2)	ish subtel der(11)t(3;11)(q29;q24.2)(3pter-,3qter+) ish subtel der(11)t(3;11)(q29;q24.2)(11pter+,11qter-)	arr 3q29(196,055,095-197,807,733)x3,11q24.2q25(125,490,907-134,446,160)x1	1.753 Mb at 3q29; 8.955 Mb at 11q24.2q25
	172408	PB			√			arr 4q35.1(185,385,148-186,070,003)x1	0.685 Mb
	13316	PB	√		√	46,XY		arr 5q35.2q35.3(175,576,602-177,487,509)x1	1.911 Mb
	254015	PB	√		√			arr 5q35.3(176,700,742-176,715,882)x1	0.015 Mb
	78709	PB	√	√	√	46,XX	ish del(5q35.2q35.3)(NSD1-)	arr 5q35.2q35.3(176,242,304-176,767,105)x1	0.525 Mb
	171008	PB	√	√	√	46,XY	ish del(5)(q35.2q35.3)(NSD1-)[5] nuc ish 5(NSD1x1)[50]	arr 5q35.2q35.3(175,509,208-177,355,366)x1	1.846 Mb
	161608	PB	√	√	√	46,XY,der(5)t(5;12)(q35.3;p13.31)	ish subtel add(5)(q35.3)(5pter+,5qter-)	arr 5q35.3(179,553,887-180,617,107)x1,12p13.33p13.31(49,967-6,424,393)x3	1.063 Mb at 5q35.3; 6.374 Mb at 12p13.33p13.31
	92712	PB			√			arr 8p23.1(7,169,490-11,860,230)x1	4.691 Mb
	296312	PB	√		√	46,XY,del(8)(p23.1p23.1)		arr 8p23.1(7,169,490-12,404,062)x1	5.235 Mb
	229715	PB	√		√	46,XX,del(8)(p23.1p23.1)		arr 8p23.1(7,273,032-11,906,266)x1	4.633 Mb
	155017	PB	√		√	46,XY,dup(8)(p23.1p23.1)		arr 8p23.1(8,111,027-11,906,266)x3	3.795 Mb
	20109	PB	√		√	46,XX,del(8)(p23.1p23.1)		arr 8p23.1(8,229,404-12,285,523)x1	4.049 Mb
	171711	PB			√			arr 15q13.2q13.3(30,943,703-32,462,842)x1	1.519 Mb	BP4-5
	70712	PB	√		√	46,XY		arr 15q13.2q13.3( 31,042,916-32,445,252)x3	1.402 Mb	BP4-5
	162910	PB	√		√	46,XY		arr 15q13.2q13.3(30,943,703-32,914,281)x3	1.971 Mb	BP4-5
	1011	PB	√		√	46,XX		arr 15q13.3(32,021,533-32,511,004)x3	0.489 Mb	? BP4-5
	258510	PB			√			arr 16p12.2p11.2(21,474,839-29,133,876)x1	7.659 Mb	16p12.2p11.2
	100615	PB			√			arr 16p11.2(28,617,585-29,238,644)x1	0.621 Mb	Distal 16p11.2
	205916	PB	√		√	46,XY		arr 16p11.2(28,824,794-29,042,118)x1	0.217 Mb	Distal 16p11.2
	68414	PB	√		√	46,XY		arr 16p11.2(28,824,794-29,042,118)x1	0.217 Mb	Distal 16p11.2
	237712	PB			√			arr 16p11.2(28,861,531-29,031,059)x1	0.170 Mb	Distal 16p11.2
	182915	PB	√		√	46,XY		arr 16p11.2(29,592,783-30,158,545)x1	0.566 Mb	proximal 16p11.2
	105617	PB			√			arr 16p11.2(29,592,783-30,190,568)x3	0.598 Mb	proximal 16p11.2
	210812	PB	√		√	46,XX		arr 16p11.2(29,592,783-30,190,568)x1	0.598 Mb	proximal 16p11.2
	208310	PB	√		√	46,XY		arr 16p11.2(29,652,799-30,197,490)x1	0.545 Mb	proximal 16p11.2
	125610	PB	√		√	46,XY		arr 16p11.2(29,652,799-30,197,490)x1	0.545 Mb	proximal 16p11.2
	233910	PB			√			arr 16p11.2(29,652,799-30,351,004)x3	0.698 Mb	proximal 16p11.2
	80510	PB	√		√	46,XY		arr 16p11.2(29,652,799-30,351,004)x3	0.698 Mb	proximal 16p11.2
	171017	PB			√			arr 16p11.2(29,652,999-30,198,123)x3	0.598 Mb	proximal 16p11.2
	144316	PB	√	√	√	46,XY	nuc ish 13q14(RB1x2),21q22(D21S259x2)	arr 16p11.2(29,652,999-30,198,611)x1	0.546 Mb	proximal 16p11.2
	20716	PB	√		√	46,XY		arr 16p11.2(29,652,999-30,198,611)x3	0.546 Mb	proximal 16p11.2
	159611	PB			√			arr 16p11.2(29,664,329-30,197,490)x1	0.533 Mb	proximal 16p11.2
	22316	PB	√		√	46,XX		arr 16p11.2(29,664,529-30,198,611)x1	0.534 Mb	proximal 16p11.2
	117811	PB			√			arr 16p11.2(29,693,891-30,083,757)x1	0.390 Mb	proximal 16p11.2
	133709	PB			√			arr 16p11.2(29,581,455-30,104,842)x3	0.523 Mb	proximal 16p11.2
	74509	PB	√		√	46,XY		arr 16p11.2(29,581,455-30,106,101)x3	0.525 Mb	proximal 16p11.2
	53109	PB	√		√	46,XY		arr 16p11.2(29,581,455-30,106,101)x1	0.525 Mb	proximal 16p11.2
	139308	PB	√		√	46,XY		arr 16p11.2(29,581,455-30,106,101)x1	0.525 Mb	proximal 16p11.2
	99916	PB			√			arr 17q11.2(29,033,882-30,348,467)x1	1.315 Mb
	75516	PB			√			arr 17q11.2(29,033,882-30,348,467)x1	1.315 Mb
	164914	PB		√	√		nuc ish(ETV6x1)[189/200],(CDKN2Ax1,D9Z3x2)[187/200]	arr 17q12(34,417,313-36,243,028)x3	1.826 Mb
	158809	PB	√		√	46,XY		arr 17q12(34,437,275-36,243,169)x1	1.806 Mb
	117712	PB			√			arr 17q12(34,611,352-36,248,918)x3	1.638 Mb
	154113	PB	√		√	46,XY		arr 17q12(34,822,500-36,248,918)x1	1.426 Mb
	50911	PB	√		√	46,XX		arr 17q12(34,832,202-36,243,169)x1	1.411 Mb
	35317	PB			√			arr 17q12(34,842,394-36,243,028)x1	1.401 Mb
	106111	PB	√	√	√	46,XX,del(4)(q34.1q34.3)	ish 22q11.2(TUPLE1x2)[20]/nuc ish 22q11.2(TUPLE1x2)[50]	arr 4q34.1q34.3(172,369,553-177,589,304)x1,17q12(34,817,222-36,243,169)x3	5.220 Mb at 4q34.1q34.3; 1.426 Mb at 17q12
	135709	PB			√			arr 17q12(34,437,475-36,168,104)x1,20p12.3(7,103,757-8,510,038)x3	1.731 Mb at 17q12; 1.406 Mb at 20p12.3
	13708	PB	√		√	46,XY		arr 17q12(34,817,422-36,168,104)x3	1.351 Mb
	274114	PB			√			arr 17q21.31(43,655,747-44,351,152)x3	0.695 Mb
	210510	PB	√	√	√	46,XY	ish del(17)(q21.31q21.31)(MAPT-,ARL17+)	arr 17q21.31(43,655,547-44,279,959)x1	0.624 Mb
	126912	PB	√		√	46,XY		arr 17p13.3(1,084,016-1,622,508)x4	0.538 Mb
	59016	PB		√	√	46,XX	ish 17p13.3(PAFAH1B1x1),17p11.2(RAI1x2)[25]	arr 7q36.3(158,260,707-159,055,069)x3,17p13.3(2,016,700-2,607,732)x1	0. 591 Mb
	231617	PB	√	√	√	46,XX	ish 17p13.3(PAFAH1B1x2),17p11.2(RAI1x2), ish 17p13.3(D17S2199x1),17cen(D17Z1x2)	arr 17p13.3(63,697-1,879,125)x1	1.815 Mb
	23312	PB	√	√	√	46,XX,del(17)(p13.3)	ish del(17)(p13.3)(17pter-,CEP17+)	arr 17p13.3(76,263-2,339,620)x1	2.263 Mb
	316616	PB		√			ish del(17)(p13.3p13.2)(PAFAH1B1-,RAI1+)[5]
	113708	PB	√		√	46,XX		arr 17p13.3(1,279,511-2,650,325)x3	1.371 Mb
	15812	PB	√	√	√	46,X,der(X)t(X;X)(p22.3;q28)	ish der(X)t(X;X)(p22.3;q28)(Xqter+;Xqter+)(CEPX+)	arr Xq28(152,146,246-155,232,907)x3,2q35(218,587,863-218,956,980)x3	3.087 Mb at Xq28; 369.1 Kb at 2q35
Subtelomeric pCNV
	112510	PB		√	√		ish Xp22.3(SHOXx2),Xcen(DXZ1x2)	arr Xp22.33(581,803-624,896)x1	0.043 Mb
	16716	PB	√		√	46,XX,dup(10)(q26.13q26.3)		arr 10q26.13q26.3(127,218,414-131,243,748)x3	4.026 Mb
	113815	PB	√		√	46,XY		arr 10q26.13(123,263,298-123,651,309)x3	0.388 Mb
	114716	PB	√	√	√	46,XY	nuc ish(DXZ1,DYZ1)x1[200]	arr 17p13.1(7,504,605-7,536,903)x3	0.032 Mb
	282516	PB			√			arr 6q26(162,198,305-162,279,506)x0	0.081 Mb
	65315	PB	√		√	46,XX		arr Xp22.33(481,940-591,887)x1	0.110 Mb
	7316	PB	√		√	46,XX		arr 1q43q44(241,576,394-244,452,045)x1,15q13.3(32,037,769-32,509,926)x3	2.876 Mb
	242617	PB	√		√	46,XX,del(10)(q26.3)		arr 10q26.3(131,243,689-135,434,178)x1	4.190 Mb
	16814	PB	√		√	46,XY		arr 16q23.3q24.1(83,082,499-84,665,863)x1	1.583 Mb
	182216	PB			√			arr 16q24.3(88,833,332-89,489,385)x1	0. 656 Mb
	161614	PB		√	√		nuc ish 17p13.1(TP53x3)[198/200]	arr 17p13.1(6,794,779-8,524,267)x3	1.731 Mb
	119613	PB			√			arr 17q25.3(77,201,692-77,774,583)x3	0.572 Mb
	215810	PB	√		√	46,XY,del(18)(p11.31)		arr 18p11.32p11.31(121,500-3,322,942)x1	3.201 Mb
	197215	PB	√		√	46,XY,del(18)(p11.31p11.31)		arr 18p11.31(3,494,381-5,921,659)x1	2.427 Mb
	246310	PB	√	√	√	46,XX	ish subtel del(19)(p13.3)(pter-,qter+)	arr 19p13.3(265,917-726,662)x1	0.461 Mb
	86417	PB		√	√		ish 19(D19S676E,RH102404)x2	arr 19p13.3(425,086-1,298,701)x1	0.874 Mb
	237814	PB	√		√	46,XX,del(2)(q27.3)		arr 2q37.3(239,860,877-243,052,365)x1	3.191 Mb
	116910	PB	√	√	√	46,XY	ish subtel 20(pter+,qter+)	arr 20p13(275,574-497,215)x1	0.222 Mb
	247609	PB	√	√	√	46,XX	ish 21q22.3(qter enh) nuc ish (21qterx3-4)	arr 21q22.3(47,608,829-48,090,458)x4	0.482 Mb
	116015	PB			√			arr 22q13.33(51,123,040-51,193,680)x1	0.071 Mb
	79613	PB	√		√	46,XX		arr 3p25.1p24.3(14,662,088-16,438,162)x1	1.776 Mb
	218913	PB	√	√	√	46,XY	nuc ish Xcen(DXZ1x1),Ycen(DYZ3x1),18cen(D18Z1x2) nuc ish 13q14(RB1x2),21q22(D21S259x2)	arr 3p26.3(527,296-2,731,697)x1	2.204 Mb
	147711	PB	√		√	46,XY		arr 3p26.1p25.3(7,639,581-10,344,193)x1	2.705 Mb
	250709	PB	√	√	√	46,XY,del(3)(p26.3)	ish subtel del(3)(p26.3)(pter-,qter+)	arr 3p26.3(73,714-2,599,153)x1	2.525 Mb
	157009	PB	√		√	46,XY		arr 5p15.2( 11,702,419-11,880,695)x1	0.178 Mb
	87815	PB	√		√	46,XX		arr 6q27(169,818,238-170,906,796)x1	1.089 Mb
	160714	PB	√		√	46,XY,del(6)(p25.1p25.3)		arr 6p25.3p25.1(2,142,335-6,152,171)x1	4.010 Mb
	276316	PB	√		√	46,XY		arr 7p22.1(4,716,904-5,889,565)x4,7p22.1(5,933,882-6,777,321)x3	1.173 Mb triplication and 0.843 Mb duplication at 7p22.1
	161009	PB		√	√		nuc ish 9q34(ABLx1),22q11.2(BCRx2)[153/200]	arr 9q34.11q34.13(131,468,653-134,027,314)x1 mos	2.559 Mb
	53610	PB	√	√	√	46,XX	ish subtel del(9)(q34.3)(pter+,qter-)	arr 9q34.3(140,363,721-141,019,125)x1	0.655 Mb
	149211	PB			√			arr 9p24.1(4,836,923-5,038,264)x1	0.201 Mb
	62609	PB		√	√		ish subtel 19p13.3(19pterx2)	arr 19p13.3(430,534-1,297,499)x1	0.867 Mb
	251508	PB	√		√	45,XX,der(6)t(6;13)(p25.2;q12.11)		arr 6p25.3p25.2(259,528-2,412,112)x1,13q11q12.11(19,703,703-22,840,113)x1	2.153 Mb at 6p25.3p25.2; 3.136 Mb at 13q11q12.11
	184608	PB	√		√	46,XX		arr 21q22.3(47,766,542-47,875,328)x1	0.109 Mb
	72008	PB	√	√	√	46,XX	ish subtel del(16)(p13.3)(pter-,qter+)	arr 16p13.3(96,766-1,171,528)x1	1.075 Mb
Interstitial pCNV
	55815	PB			√			arr 1q22q23.1(155,679,849-156,660,462)x1	0.981 Mb
	141615	PB	√		√	46,XY		arr 14q22.1q22.2(53,677,607-54,737,691)x1	1.060 Mb
	179016	PB			√			arr 2q23.1(149,086,721-149,151,023)x1	0.064 Mb
	29816	PB			√			arr Xq26.2(132,856,313-133,250,394)x2	0.394 Mb
	286614	PB			√			arr Xp11.4(41,334,334-41,524,578)x2	0.190 Mb
	258316	PB			√			arr 1q31.2q31.3(191,689,637-196,229,960)x1	4.540 Mb
	37512	PB	√		√	46,XX,del(1)(q41q42.12)		arr 1q41q42.12(223,225,634-225,731,488)x1	2.506 Mb
	213215	PB	√		√	46,XX		arr 1p35.1p34.3(33,624,962-35,718,320)x1	2.093 Mb
	273110	PB			√			arr 1p34.3(37,692,253-38,591,689)x1	0.899 Mb
	67413	PB	√	√	√	46,XY	ish 22q11.2(TUPLE1x2),22q13.3(SHANK3x2)[30]/nuc ish (TUPLE1,SHANK3)x2[50]	arr 10q24.32(103,077,765-103,410,136)x3	0.332 Mb
	249311	PB	√		√	46,XY		arr 10q21.2(63,123,886-64,979,820)x1	1.856 Mb
	20114	PB	√		√	46,XX,del(11)(q23.1q23.3)		arr 11q23.1q23.3(110,967,252-114,576,645)x1	3.609 Mb
	166714	PB	√		√	46,XY,del(11)(q24.1q24.2)		arr 11q24.1q24.2(121,737,303-125,625,146)x1	3.888 Mb
	65215	PB			√			arr 11p14.1p13(30,529,821-34,129,804)x1	3.6 Mb
	122613	PB	√		√	46,XY		arr 11p13(31,172,410-31,683,546)x1	0.511 Mb
	222016	PB			√			arr 11q12.1q12.2(58,477,569-60,253,259)x1,Xp22.33(387,301-628,283)x1	1.776 Mb at 11q12.1q12.2; 0.241 Mb at Xp22.33
	72517	PB	√		√	46,XY,del(12)(q23.1q23.2)		arr 12q23.1q23.2(98,469,892-102,315,025)x1	3.845 Mb
	209315	PB			√			arr 13q32.3(100,887,634-100,926,466)x1	0.039 Mb
	180515	PB			√			arr 14q13.3(36,971,273-37,020,815)x1	0.050 Mb
	31516	PB	√		√	46,XY,del(14)(q22.3q23.1)		arr 14q22.3q23.1(57,268,735-62,050,346)x1	4.782 Mb
	152015	PB	√		√	46,XX,del(14)(q24.3q24.3)		arr 14q24.3(76,219,420-79,207,026)x1	2.988 Mb
	292416	PB			√			arr 16q21(61,106,089-62,305,949)x1	1.200 Mb
	130311	PB			√			arr 16q22.1q22.3(70,048,608-72,935,715)x1	2.88 Mb
	171610	PB	√	√	√	46,XX	ish del(17)(q23.1q23.2)(TMEM49-,PPM1D-,TBX4+)	arr 17q22q23.2(55,717,537-59,257,880)x1	3.540 Mb
	166512	PB	√	√	√	46,XY	ish 22q11.2(TUPLE1x2),22q13.3(SHANK3x2)[25]/nuc ish (TUPLE1,SHANK3)x2[50]	arr 18q11.2(19,607,321-20,143,372)x3	0.536 Mb
	113412	PB	√		√	46,XY		arr 19q13.32q13.33(47,343,480-48,317,822)x3	0.974 Mb
	254210	PB	√		√	46,XY,dup(2)(q24.2q24.3)		arr 2q24.2q24.3(161,846,163-164,961,345)x3	3.115 Mb
	202511	PB			√			arr 2q24.3(166,744,622-166,919,102)x1	0.174 Mb
	146717	PB			√			arr 2p16.3(51,193,626-51,326,266)x1	0.133 Mb
	183115	PB	√		√	46,XX,del(3)(q22.1q22.3)		arr 3q22.1q22.3(132,167,027-137,158,807)x1	4.992 Mb
	258215	PB			√			arr 3q26.32(176,109,770-177,389,887)x1	1.280 Mb
	246510	PB	√		√	46,XY,del(3)(p14.1p14.2)		arr 3p14.2p14.1(60,877,362-65,794,970)x1	4.918 Mb
	170712	PB	√	√	√	46,XX	nuc ish Xcen(DXZ1x2)[200] ish X(DXZ1+,SRY-)x2[30]	arr 4q24(104,624,585-105,315,232)x3	0.691 Mb
	32012	PB	√		√	46,XY,del(4)(q25q25)		arr 4q25(110,147,617-113,267,559)x1	3.120 Mb
	178717	PB	√		√	46,XY,dup(5)(q31.2q31.3)		arr 5q31.2q31.3(139,372,091-143,765,703)x3	4.394 Mb
	93717	PB	√		√	46,XY		arr 5p13.2(37,048,602-37,364,506)x3	0.316 Mb
	159909	PB	√		√	46,XX		arr 5q12.1(58,989,583-59,086,495)x1	0.097 Mb
	6513	PB	√		√	46,XX,del(7)(p15.3p21.1)		arr 7p21.1p15.3(19,392,302-24,245,297)x1	4.853 Mb
	198515	PB			√			arr 9q22.32(98,168,886-98,532,968)x1	0.364 Mb
	69213	PB	√		√	46,XY		arr Xq23(109,472,259-109,908,339)x0	0.436 Mb
	27510	PB			√			arr Xq26.2(132,300,487-132,454,02;132,887,828-132,972,199)x1	0.154 Mb and 0.084 Mb at Xq26.2
	62311	PB	√		√	46,XY		arr Xq26.2(132,300,487-132,454,02;132,887,828-132,972,199)x0	0.154 Mb and 0.084 Mb at Xq26.2
	101613	PB	√		√	46,XX		arr Xp22.13(18,308,916-18,736,169)x3	0.427 Mb
	173717	PB			√			arr 6q12(67,937,222-69,533,601)x3,Xp21.1(31,900,436-32,108,797)x0	1.596 Mb at 6q12; 0.208 Mb at Xp21.1
	82513	PB			√			arr Xp11.4p11.3(42,210,685-43,752,512)x0	1.542 Mb
	307615	PB			√			arr 16q24.3(89,839,250-89,864,425)x1,Xp11.22(53,401,663-53,522,961)x2	0.025 Mb at 16p24.3; 0.121 Mb at Xp11.22
	275514	PB			√			arr Xq21.33q22.1(97,458,245-99,605,731)x1	2.147 Mb
	356517	PB			√			arr 2p16.3(50,300,564-50,428,469)x1,18q12.2(34,282,621-34,951,109)x3	0.128 Mb at 2p16.3; 0.669 Mb at 18q12.2
	257508	PB			√			arr 2q12.1q12.2(104,191,930-106,910,003)x1	2.718 Mb
	9608	PB			√			arr 18q21.2(50,432,658-53,254,392)x1	2.822 Mb
	277008	PB	√		√	46,XX		arr 2q23.1(149,345,510-149,682,358)x1	0.337 Mb
	92409	PB	√		√	46,XX		arr Xq22.1(99,772,093-100,402,262)x3	0.630 Mb
	91608	PB	√	√	√	46,XY	ish 15(RP11-185K12+,RP11-124A24+),del(15)(q15.2q15.2)(RP11-185K12-,RP11-124A24+)	arr 15q15.2(43,087,385-43,237,163)x1	0.150 Mb
